# Supplementary material for: ENaC-mediated sodium influx exacerbates NLRP3-dependent inflammation in cystic fibrosis
Source: eLife. 2019 Sep 18;8:e49248. doi: 10.7554/eLife.49248 (PMC6764826; doi:10.7554/eLife.49248)
Supplement: Figure 3—figure supplement 1—source data 1. [file elife-49248-fig3-figsupp1-data1.xlsx]

## Sheet: TNF
	HC		CF		SAID		NCFB
	HC1	137.489	CF01	52.6227	MW1	161.307	unknown	63.5567
	HC2	36.795	CF02	45.4508	TRAPS1	285.931	CCDC103	44.3354
	HC3	246.66	CF03	48.5213	PAAND	155.459	OFD1	20.7958
	HC4	241.668	CF04	55.1904	HIDS1	601.734	OFD1	158.115
	HC5	30.7815	CF05	61.3664	HIDS2	435.036
	HC6	40.3106	CF06	69.1137	FMF1	56.9616
	HC7	44.839	CF07	71.1847	FMF2	566.932
	HC8	48.8723	CF08	76.8915
	HC9	49.377	CF09	31.6918
	HC10	50.3867	CF10	33.2159
			CF11	32.1997
			CF12	32.7077
			CF13	35.7587
			CF14	25.1007
			CF15	35.2499
			CF16	30.1688
			CF17	223.673
			CF18	265.111
			CF19	261.67
			CF21	261.097
			CF22	304
			CF23	262.243
			CF26	46.9854
			CF28	45.4508
			CF29	51.5965
			CF30	48.0092
			CF31	305.761
			CF32	37.7952
			CF33	28.14
			CF34	20.0453

## Sheet: IL-6
	HC		CF		SAID		NCFB
	HC1	52.0905	CF01	71.9104	MW1	236.228	unknown	59.4004
	HC2	65.7443	CF02	44.4015	TRAPS1	231.36	CCDC103	31.9437
	HC3	31.2049	CF03	38.4448	PAAND	443.913	OFD1	14.8407
	HC4	53.3471	CF04	40.1785	HIDS1	41.098	OFD1	53.8502
	HC5	41.8438	CF05	35.4795	HIDS2	126.077
	HC6	67.5277	CF06	34.7395	FMF1	211.261
	HC7	64.4723	CF07	21.0245	FMF2	181.219
	HC8	14.1138	CF08	21.5112
	HC9	11.6947	CF09	67.8243
	HC10	14.8407	CF10	71.9104
			CF11	72.4224
			CF12	74.4729
			CF13	75.2429
			CF14	76.7848
			CF15	79.3601
			CF16	64.5168
			CF17	44.6505
			CF18	42.412
			CF19	44.4015
			CF21	61.7268
			CF22	17.1394
			CF23	13.5104
			CF26	44.6505
			CF28	91.2948
			CF29	5.57097
			CF30	7.25002
			CF31	20.7813
			CF32	19.5659
			CF33	18.5946
			CF34	43.1576
