# Supplementary material for: ENaC-mediated sodium influx exacerbates NLRP3-dependent inflammation in cystic fibrosis
Source: eLife. 2019 Sep 18;8:e49248. doi: 10.7554/eLife.49248 (PMC6764826; doi:10.7554/eLife.49248)
Supplement: Figure 3—source data 1. [file elife-49248-fig3-data1.xlsx]

## Sheet: IL-18
	HC		CF		SAID		NCFB
	HC1	29.6441	CF01	377.183	MW1	1008.71	unknown	209.823
	HC2	162.612	CF02	164.765	A20	1294.7	CCDC103	124.369
	HC3	102.43	CF03	368.459	TRAPS1	163.965	OFD1	98.688
	HC4	214.372	CF04	115.307	PAAND	835.82	OFD1	163.883
	HC5	53.1573	CF05	93.8499	TRAPS2	615.769
	HC6	117.455	CF06	451.527	FMF1	518.527
	HC7	93.8499	CF07	76.704	FMF2	850.294
	HC8	83.7332	CF08	335.784	HIDS1	1012.37
	HC9	188.472	CF09	194.943	HIDS2	1929.49
	HC10	117.455	CF10	877.88	SS	1801.74
			CF11	147.735
			CF12	76.0845
			CF13	1124.9
			CF14	106.733
			CF15	268.06
			CF16	154.948
			CF17	166.507
			CF18	120.761
			CF19	166.507
			CF21	232.469
			CF22	381.029
			CF23	281.042
			CF26	31.1133
			CF28	678.487
			CF29	684.589
			CF30	507.635
			CF31	115.344
			CF32	313.904
			CF33	339.803
			CF34	499.514

## Sheet: IL-1b
	HC		CF		SAID		NCFB
	HC1	4.18993	CF001	11.0305	MW1	12.0794	unknown	3.06804
	HC2	2.4168	CF002	13.5058	A20	12.2725	CCDC103	19.2351
	HC3	4.28358	CF003	11.1252	TRAPS1	12.1759	OFD1	5.99801
	HC4	4.84623	CF004	46.3199	PAAND	12.1759	OFD1	12.6058
	HC5	5.03405	CF005	13.028	TRAPS2	89.6055
	HC6	4.18993	CF006	11.22	FMF1	92.0235
	HC7	6.35256	CF007	33.3553	FMF2	21.5663
	HC8	3.90916	CF008	70.5127	HIDS1	12.8371
	HC9	13.9191	CF009	12.7417	HIDS2	12.9325
	HC10	4.00271	CF010	15.0407	SS	13.9845
			CF011	12.6463
			CF012	13.219
			CF014	24.0426
			CF015	12.8371
			CF016	13.028
			CF017	14.8484
			CF018	12.7417
			CF019	18.7222
			CF021	14.4641
			CF022	13.1235
			CF023	13.1235
			CF024	20.4839
			CF026	15.9081
			CF028	12.9325
			CF029	17.0689
			CF030	13.5058
			CF031	9.048
			CF032	12.551
			CF033	8.01553
			CF034	33.3553

## Sheet: IL-1RA
	HC		CF		SAID		NCFB
	HC1	67.6859	CF01	901.098	MW1	697.289	unknown	175.257
	HC2	35.1764	CF02	169.069	TRAPS1	345.317	CCDC103	116.29
	HC3	104.204	CF03	273.035	PAAND	871.609	OFD1	154.562
	HC4	55.018	CF04	148.833	HIDS1	268.638	OFD1	162.144
	HC5	162.77	CF05	434.179	HIDS2	320.226
	HC6	109.625	CF06	274.633	FMF1	106.252
	HC7	46.1578	CF07	544.878	FMF2	202.852
	HC8	40.2882	CF08	381.68
	HC9	42.4858	CF09	742.585
	HC10	74.448	CF10	131.774
			CF11	679.609
			CF12	228.072
			CF13	151.07
			CF14	304.46
			CF15	273.035
			CF16	637.165
			CF17	390.183
			CF18	1125.89
			CF19	320.79
			CF21	700.699
			CF22	160.797
			CF23	193.354
			CF26	88.7488
			CF28	163.049
			CF29	2477.25
			CF30	527.333
			CF31	85.8692
			CF32	377.444
			CF33	60.8707
			CF34	111.955

## Sheet: ASC
	HC		CF		SAID		NCFB
	HC1	1.07	CF32	148.28	MW1	634.57	unknown	8.15
	HC2	1.58	CF02	41.51	A20	1902	CCDC103	4.36
	HC3	8.28	CF03	40.835	TRAPS1	2303.24	OFD1	4.22
	HC4	34.335	CF04	37.915	PAAND	993.09	OFD1	0
	HC5	5.96	CF23	34.11	TRAPS2	1151.48
	HC6	4.115	CF26	33.445	FMF1	1338.24
	HC7	2.65	CF28	2.56	FMF2	1681.81
	HC8	25.51	CF08	50.115	HIDS1	1259
	HC9	4.775	CF09	8.9	HIDS2	777.82
	HC10	2.165	CF10	8.17	SS	951.84
			CF11	27.36
			CF22	76.405
			CF13	11.365
			CF33	68.25
			CF34	42.625

## Sheet: TNF
	HC		CF		SAID		NCFB
	HC1	137.489	CF01	52.6227	MW1	161.307	unknown	63.5567
	HC2	36.795	CF02	45.4508	TRAPS1	285.931	CCDC103	44.3354
	HC3	246.66	CF03	48.5213	PAAND	155.459	OFD1	20.7958
	HC4	241.668	CF04	55.1904	HIDS1	601.734	OFD1	158.115
	HC5	30.7815	CF05	61.3664	HIDS2	435.036
	HC6	40.3106	CF06	69.1137	FMF1	56.9616
	HC7	44.839	CF07	71.1847	FMF2	566.932
	HC8	48.8723	CF08	76.8915
	HC9	49.377	CF09	31.6918
	HC10	50.3867	CF10	33.2159
			CF11	32.1997
			CF12	32.7077
			CF13	35.7587
			CF14	25.1007
			CF15	35.2499
			CF16	30.1688
			CF17	223.673
			CF18	265.111
			CF19	261.67
			CF21	261.097
			CF22	304
			CF23	262.243
			CF26	46.9854
			CF28	45.4508
			CF29	51.5965
			CF30	48.0092
			CF31	305.761
			CF32	37.7952
			CF33	28.14
			CF34	20.0453

## Sheet: IL-6
	HC		CF		SAID		NCFB
	HC1	52.0905	CF01	71.9104	MW1	236.228	unknown	59.4004
	HC2	65.7443	CF02	44.4015	TRAPS1	231.36	CCDC103	31.9437
	HC3	31.2049	CF03	38.4448	PAAND	443.913	OFD1	14.8407
	HC4	53.3471	CF04	40.1785	HIDS1	41.098	OFD1	53.8502
	HC5	41.8438	CF05	35.4795	HIDS2	126.077
	HC6	67.5277	CF06	34.7395	FMF1	211.261
	HC7	64.4723	CF07	21.0245	FMF2	181.219
	HC8	14.1138	CF08	21.5112
	HC9	11.6947	CF09	67.8243
	HC10	14.8407	CF10	71.9104
			CF11	72.4224
			CF12	74.4729
			CF13	75.2429
			CF14	76.7848
			CF15	79.3601
			CF16	64.5168
			CF17	44.6505
			CF18	42.412
			CF19	44.4015
			CF21	61.7268
			CF22	17.1394
			CF23	13.5104
			CF26	44.6505
			CF28	91.2948
			CF29	5.57097
			CF30	7.25002
			CF31	20.7813
			CF32	19.5659
			CF33	18.5946
			CF34	43.1576

## Sheet: Caspase-1
	HC		CF		SAID		NCFB
	HC1	106.021	CF32	240.83	FMF1	197.89	unknown	80.36
	HC2	130.727	CF02	156.87	FMF2	160.47	CCDC103	140.08
	HC3	117.774	CF03	143.92	TRAPS1	196.21	OFD1	117.77
	HC4	146.798	CF04	157.35	TRAPS2	186.86	OFD1	81.79
	HC5	46.5339	CF23	207.72
	HC6	38.8582	CF26	141.52
	HC7	121.612	CF28	145.12
	HC8	89.9496	CF08	149.2
	HC9	97.3855	CF09	223.79
	HC10	104.342	CF10	202.93
			CF11	181.82
			CF22	377.79
			CF13	153.27
			CF33	137.2
			CF34	142
